# Supplementary material
Source: Springer Nature journal article supplement (https://www.springermedizin.de/resource/supplementary/12891_2009_726_MOESM5_ESM.pdf/9506270)

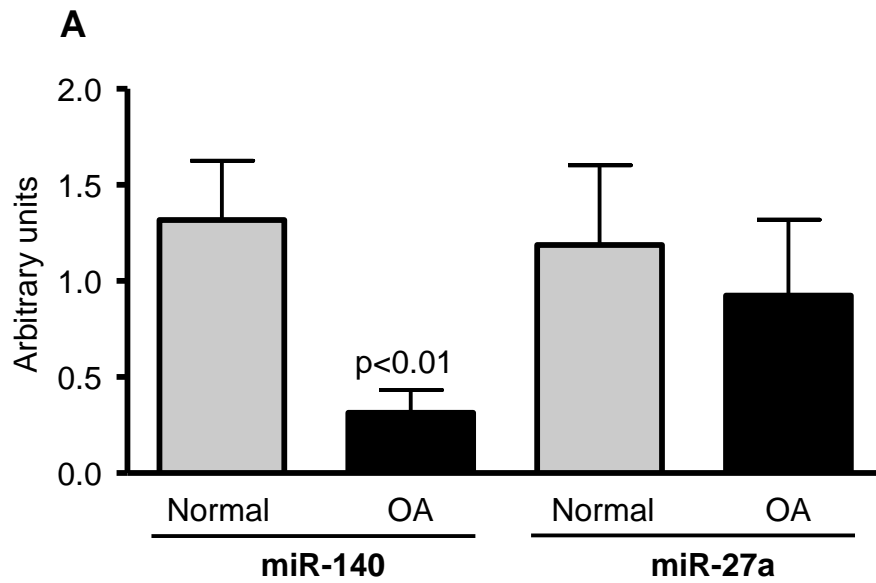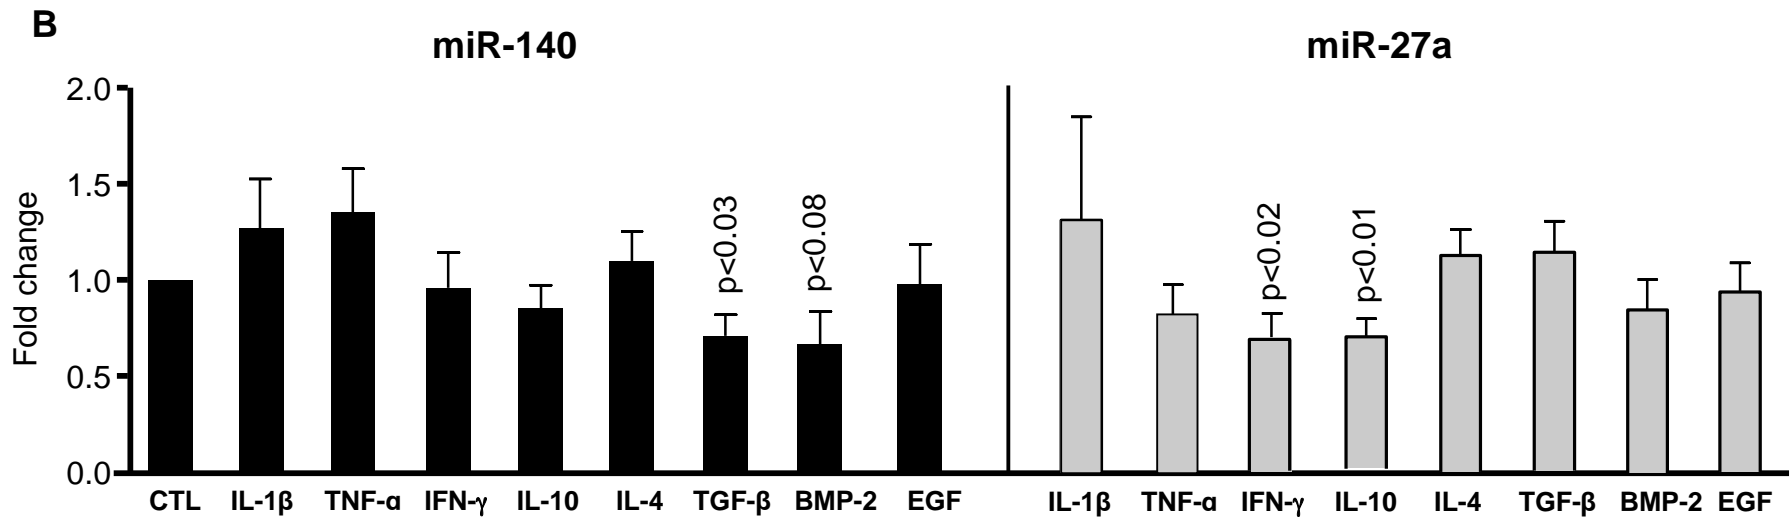

Supplement: MOESM5 [file 9506270]
